# Supplementary material for: Combining RANK/RANKL and ERBB-2 targeting as a novel strategy in ERBB-2-positive breast carcinomas
Source: PubMed Central journal article supplement (PMC6892243; doi:10.1186/s13058-019-1226-9), 2019-12-03

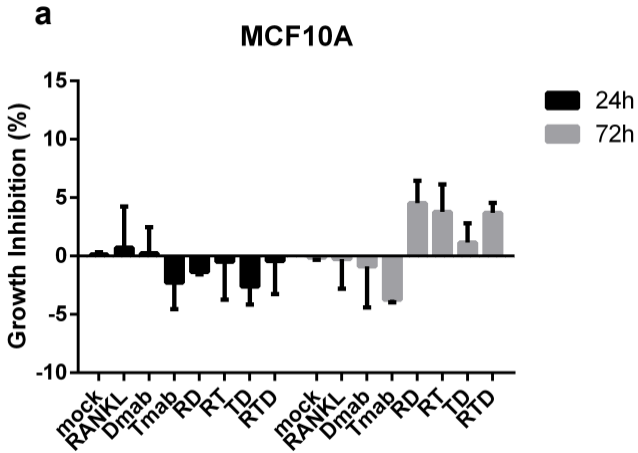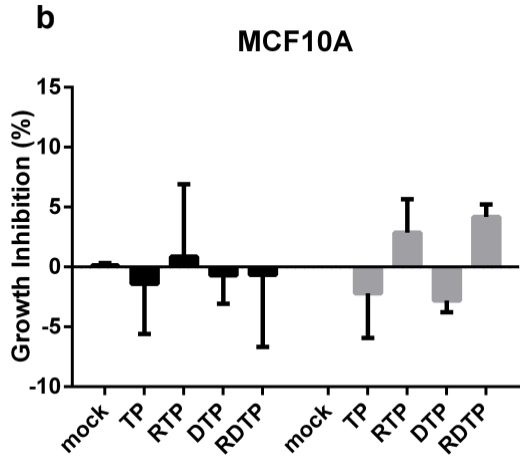

Supplement: 13058_2019_1226_MOESM2_ESM.pdf [file 13058_2019_1226_MOESM2_ESM.pdf]
