# Supplementary material for: Combining RANK/RANKL and ERBB-2 targeting as a novel strategy in ERBB-2-positive breast carcinomas
Source: Springer Nature journal article supplement (doi:10.1186/s13058-019-1226-9), 2019-12-01

**a** ERBB2+/ ER-

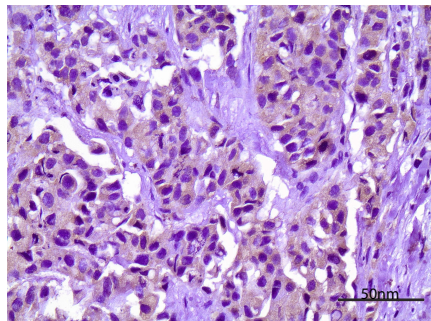

**b** ERBB2-/ ER+

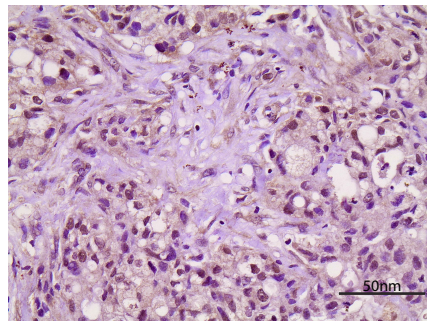

**c** ERBB2-/ ER-

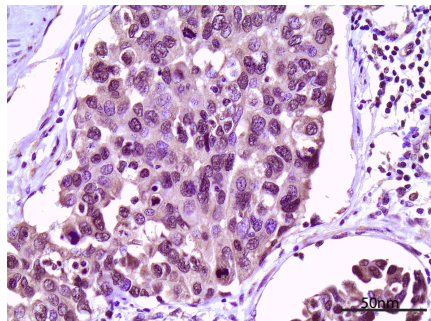

**d** ERBB2+/ ER+

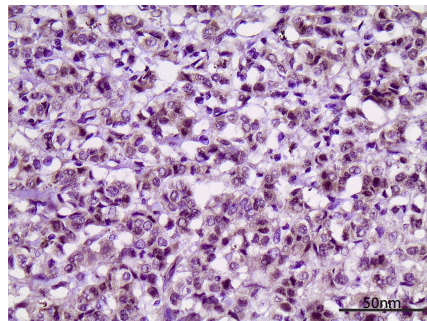

Supplement: MOESM1 [file 17464002]
